# Supplementary material for: A Survey of People With Parkinson’s and Their Carers: The Management of Pain in Parkinson’s
Source: PubMed Central journal article supplement (PMC9210119; doi:10.1177/08919887211023592), 2021-07-08
Supplement: sj-pdf-1-jgp-10.1177_08919887211023592.pdf [file sj-pdf-1-jgp-10.1177_08919887211023592.pdf]

## Supplementary materials

### Survey

What is your association with Parkinson's?

I have Parkinson's

I am a carer/partner/family member or friend

### People with Parkinson's

- What age are you?
  - a.  Under 30
  - b.  30-49
  - c.  50-59
  - d.  60-69
  - e.  70-79
  - f.  80 or over
  
- When were you diagnosed with Parkinson's?
  - a.  Less than 2 years ago
  - b.  2-5 years ago
  - c.  6-10 years ago
  - d.  11-20 years ago
  - e.  More than 20 years ago
  
- Does pain impact your day-to-day life?
  - a. Yes
  - b. No
  - c. Not sure

Please tell us how your pain affects you:

- How frequently do you experience pain?
  - a. Never
  - b. Rarely (around once per year)
  - c. Sometimes (around once per month)
  - d. Frequently (around once per week)
  - e. Very frequently (most days)
  
- Is pain a symptom you discuss with your healthcare professional?
  - a. No I haven't discussed pain with a healthcare professional
  - b. Yes I've discussed with my GP (General Practitioner)
  - c. Yes I've discussed with my Parkinson's nurse
  - d. Yes I've discussed with my Physiotherapist
  - e. Yes I've discussed with my Occupational Therapist
  - f. Yes I've discussed with my Dietician
  - g. Yes I've discussed with another healthcare professional (please detail)

- What did the healthcare professional do to support you with your pain?
  - a. Nothing
  - b. Advice, education or information
  - c. Medication
  - d. Exercise
  - e. Complementary therapy (e.g. massage, acupuncture)
  - f. Other (please detail)
  
- Are you doing anything to help manage your pain?
  
- What would you expect from a pain management intervention?
  
- Would you want a healthcare professional to be involved, or would you prefer something that could self-manage?
  
- What impact would a better pain management strategy have on you?

### **Carers**

- What age is the person with Parkinson's?
  - a. \_\_\_ Under 30
  - b. \_\_\_ 30-49
  - c. \_\_\_ 50-59
  - d. \_\_\_ 60-69
  - e. \_\_\_ 70-79
  - f. \_\_\_ 80 or over
  
- When were they diagnosed with Parkinson's?
  - a. \_\_\_ Less than 2 years ago
  - b. \_\_\_ 2-5 years ago
  - c. \_\_\_ 6-10 years ago
  - d. \_\_\_ 11-20 years ago
  - e. \_\_\_ More than 20 years ago
  
- Does pain impact their day-to-day life?
  - a. Yes
  - b. No
  - c. Not sure

Please tell us how your pain affects them:

- How frequently do they experience pain?
  - a. Never
  - b. Rarely (around once per year)
  - c. Sometimes (around once per month)
  - d. Frequently (around once per week)
  - e. Very frequently (most days)

- Is pain a symptom they discuss with their healthcare professional?
  - a. No they haven't discussed pain with a healthcare professional
  - b. Yes they've discussed with their GP (General Practitioner)
  - c. Yes they've discussed with their Parkinson's nurse
  - d. Yes they've discussed with their Physiotherapist
  - e. Yes they've discussed with their Occupational Therapist
  - f. Yes they've discussed with their Dietician
  - g. Yes they've discussed with another healthcare professional (please detail)
  
- What did the healthcare professional do to support them with their pain?
  - a. Nothing
  - b. Advice, education or information
  - c. Medication
  - d. Exercise
  - e. Complementary therapy (e.g. massage, acupuncture)
  - f. Other (please detail)
  
- Is the person with Parkinson's doing anything to manage their pain?
  
- What would you expect from a pain management intervention?
  
- Would you want a healthcare professional to be involved, or would you prefer something that the person with Parkinson's could manage themselves/with your support?
  
- What impact do you think a better pain management strategy would have on them?
